# Supplementary material
Source: publisher figshare collection journal article supplement (https://acs.figshare.com/ndownloader/files/11138396)
Supplement: Supplementary file 1 [file 11138396]

#\#CIF_1.1
 
#------------------ SECTION 1. GLOBAL INFORMATION ---------------------------#
 
data_CaCp2_IAM_070_elongated

#------------------ AUTHOR DETAILS -------------------------------------------#
 
# Name and address of author for correspondence
 
_publ_contact_author
;
  Prof. Dr. Simon Grabowsky
  Universität Bremen
  Fachbereich 2 - Biologie/Chemie 
  Institut für Anorganische Chemie und Kristallographie
  Leobener Str. NW 2, A4036
  28359 Bremen
  Germany
;
_publ_contact_author_email 'simon.grabowsky@uni-bremen.de'
_publ_contact_author_fax ''
_publ_contact_author_phone '+49(0)421 218 63152'
_publ_requested_journal 'Inorganic Chemistry'
_publ_section_title
;
Linear MgCp*2 vs. Bent CaCp*2: Attractive Dispersion, Ligand-Induced Charge 
Localizations and Pseudo-Pregostic C-H···Ca Interactions
;

loop_
_publ_author_name
_publ_author_address
'Pal, Rumpa'
;
University of Bremen
Institute for Inorganic Chemistry and Crystallography
Leobener Str. NW2
28359 Bremen
Germany
;


'Mebs,Stefan'
;
;


'Shi, Ming W.'
;
;

'Jayatilaka, Dylan'
;
School of Chemistry and Biochemistry, Chemistry M313, 
The University of Western Australia, 
35 Stirling Highway, 
Crawley WA 6009 
Australia
;

'Krzeszczakowska, Joanna M.'
;
;
'Malaspina, Lorraine A.'
;
;

'Wiecko, Michal'
;
;

'Luger, Peter'
;
;

'Hesse, Malte'
;
;

'Chen, Yu-Sheng'
;
;

'Beckmann, Jens'
;
;

'Grabowsky, Simon'
;
  Universität Bremen
  Fachbereich 2 - Biologie/Chemie
  Institut für Anorganische Chemie und Kristallographie
  Leobener Str. NW 2, A4036
  28359 Bremen
  Germany
;

# Insert blank lines between references
 
_publ_section_references
;
Blessing, R. H. (1995) Acta Cryst., A51, 33-38.
 
Blessing, R. H. (1987) Cryst. Rev. 1, 3-58.
 
Blessing, R. H. (1989) J. Appl. Cryst. 22, 396-397.
 
Bruker (2012) APEX2 (Version 2012.10-0), SAINT (version 8.27B), SADABS
(version 2012/1), BrukerAXS Inc, Madison, Wisconsin, USA.
 
Cambridge Structural Database: Allen, F. R. (2002). Acta Cryst. B58, 380-388.
 
SHELX: Sheldrick, G. M. (2008). Acta Cryst. A64, 112-122.

Volkov, A.; Macchi, P.; Farrugia, L. J.; Gatti, C.; 
Mallinson, P. R.; Richter, T. and Koritsanszky, T. (2006)

WinGX: Farrugia, L. J. (2012). J. Appl. Cryst. 45, 849-854.

XD2006 - a computer program for multipole refinement,
topological analysis and evaluation of intermolecular
energies from experimental and theoretical structure factors.

;
 
#------------------  SECTION 2. COMPOUND(S) DETAILS -------------------------#
 
_audit_creation_date                2018-2-5
_audit_creation_method              'Tonto 17.12.12 github v. daf061c'
 
#----------------------------------------------------------------------------#
#                   CHEMICAL INFORMATION                                     #
#----------------------------------------------------------------------------#
 
_chemical_formula_moiety                'C20 H30 Ca'
_chemical_formula_sum                   'C20 H30 Ca'
_chemical_formula_weight                310.52
_chemical_compound_source               synthesis
 
#----------------------------------------------------------------------------#
#                   UNIT CELL INFORMATION                                    #
#----------------------------------------------------------------------------#
 
_symmetry_cell_setting                  monoclinic
_symmetry_space_group_name_H-M          'P 21/n'
_symmetry_space_group_name_Hall         '-P 2yn'
_symmetry_Int_Tables_number             14
loop_
    _symmetry_equiv_pos_as_xyz
'x, y, z'
'-x+1/2, y+1/2, -z+1/2'
'-x, -y, -z'
'x-1/2, -y-1/2, z-1/2'
 
_cell_length_a                          9.6254(3)
_cell_length_b                          12.2852(4)
_cell_length_c                          30.7537(9)
_cell_angle_alpha                       90
_cell_angle_beta                        96.2650(10)
_cell_angle_gamma                       90
_cell_volume                            3614.91(19)
_cell_formula_units_Z                   8
_cell_measurement_temperature           12(1)
_cell_measurement_reflns_used           9861
_cell_measurement_theta_min             4.58
_cell_measurement_theta_max             62.16
_cell_measurement_wavelength            0.41328
 
#----------------------------------------------------------------------------#
#                   CRYSTAL INFORMATION                                      #
#----------------------------------------------------------------------------#
 
_exptl_crystal_description              block
_exptl_crystal_colour                   colorless
_exptl_crystal_size_max                 0.15
_exptl_crystal_size_mid                 0.12
_exptl_crystal_size_min                 0.04
_exptl_crystal_density_diffrn           1.141
_exptl_crystal_density_method           'not measured'
_exptl_crystal_F_000                    1360
 
#----------------------------------------------------------------------------#
#                   ABSORPTION CORRECTION                                    #
#----------------------------------------------------------------------------#
 
_exptl_absorpt_coefficient_mu           0.063
_exptl_absorpt_correction_type          multi-scan
_exptl_absorpt_correction_T_min         0.632
_exptl_absorpt_correction_T_max         0.746
_exptl_absorpt_process_details          
;
SADABS-2016/2 - Bruker AXS area detector scaling and absorption correction
;
 
#----------------------------------------------------------------------------#
#                   DATA COLLECTION                                          #
#----------------------------------------------------------------------------#
 
_diffrn_source                          synchrotron
_diffrn_ambient_temperature             12(1)
_diffrn_radiation_wavelength            0.41328
_diffrn_radiation_type                  synchrotron
_diffrn_radiation_probe                 x-ray
_diffrn_measurement_device_type         'Bruker APEX II CCD area detector'
_diffrn_measurement_method              'phi scans'
_diffrn_standards_number                0
_diffrn_standards_interval_time         .
_diffrn_standards_interval_count        .
_diffrn_reflns_av_R_equivalents         0.0551
_diffrn_reflns_av_unetI/netI            0.0219
_diffrn_reflns_number                   136591
_diffrn_reflns_limit_h_min              -9
_diffrn_reflns_limit_h_max              13
_diffrn_reflns_limit_k_min              -17
_diffrn_reflns_limit_k_max              17
_diffrn_reflns_limit_l_min              -43
_diffrn_reflns_limit_l_max              43
_diffrn_reflns_theta_min                1.237
_diffrn_reflns_theta_max                17.169
_diffrn_reflns_theta_full               14.357
_diffrn_measured_fraction_theta_full
                                        0.999
_diffrn_measured_fraction_theta_max
                                        1
_diffrn_reflns_Laue_measured_fraction_full
                                        0.999
_diffrn_reflns_Laue_measured_fraction_max
                                        1
_diffrn_reflns_point_group_measured_fraction_full
                                        0.999
_diffrn_reflns_point_group_measured_fraction_max
                                        1
_reflns_Friedel_coverage                0
_reflns_number_total                    11048
_reflns_number_gt                       9754
_reflns_threshold_expression            'I > 2\s(I)'
 
#----------------------------------------------------------------------------#
#                   COMPUTER PROGRAMS USED                                   #
#----------------------------------------------------------------------------#
 
_computing_data_collection              'Bruker APEX II'
_computing_cell_refinement              'Bruker APEX II'
_computing_data_reduction               'Bruker XPREP and SADABS'
_computing_structure_solution           'SHELXS-97 (Sheldrick, 2008)'
_computing_structure_refinement         'SHELXL-2014/7 (Sheldrick, 2014)'
_computing_molecular_graphics           'ORTEP-3 for Windows (Farrugia, 2012)'
_computing_publication_material
                          'WinGX publication routines (Farrugia, 2012)'
 
#----------------------------------------------------------------------------#
#                   STRUCTURE SOLUTION                                       #
#----------------------------------------------------------------------------#
 
_atom_sites_solution_hydrogens          geom
 
 
 
#----------------------------------------------------------------------------#
#                   ATOMIC TYPES, COORDINATES AND THERMAL PARAMETERS         #
#----------------------------------------------------------------------------#
 
loop_
    _atom_type_symbol
    _atom_type_description
    _atom_type_scat_dispersion_real
    _atom_type_scat_dispersion_imag
    _atom_type_scat_source
C C -0.0001 0.0005 'International Tables Vol C Tables 4.2.6.8 and 6.1.1.4'
H H 0 0 'International Tables Vol C Tables 4.2.6.8 and 6.1.1.4'
Ca Ca 0.0957 0.1049 'International Tables Vol C Tables 4.2.6.8 and 6.1.1.4'
 
loop_
_atom_site_label
_atom_site_fract_x
_atom_site_fract_y
_atom_site_fract_z
_atom_site_U_iso_or_equiv
_atom_site_adp_type
_atom_site_occupancy
_atom_site_disorder_group
    C7   0.42522(8)   0.92237(6)   0.70216(2)   0.007662  Uani  1.000000   0
    C8   0.45423(8)   1.00771(6)   0.67329(2)   0.007412  Uani  1.000000   0
    C9   0.33897(8)   1.08075(6)   0.66966(2)   0.007502  Uani  1.000000   0
   C10   0.23873(8)   1.04023(6)   0.69608(2)   0.008002  Uani  1.000000   0
    C6   0.29185(8)   0.94209(6)   0.71597(2)   0.008233  Uani  1.000000   0
   C17   0.52559(8)   0.83569(6)   0.71997(2)   0.010480  Uani  1.000000   0
  H17A   0.570871(0)  0.858336(0)  0.752275(0)  0.016000  Uiso  1.000000   0
  H17B   0.606991(0)  0.826957(0)  0.698815(0)  0.016000  Uiso  1.000000   0
  H17C   0.470738(0)  0.759633(0)  0.721574(0)  0.016000  Uiso  1.000000   0
   C18   0.58878(8)   1.02385(6)   0.65365(3)   0.010803  Uani  1.000000   0
  H18A   0.673784(0)  1.029960(0)  0.679380(0)  0.016000  Uiso  0.410000   7
  H18B   0.582746(0)  1.097478(0)  0.634528(0)  0.016000  Uiso  0.410000   7
  H18C   0.606317(0)  0.955643(0)  0.632935(0)  0.016000  Uiso  0.410000   7
  H18E   0.657026(0)  1.075747(0)  0.674577(0)  0.016000  Uiso  0.590000   8
  H18F   0.567484(0)  1.061269(0)  0.621954(0)  0.016000  Uiso  0.590000   8
  H18D   0.638456(0)  0.946231(0)  0.650231(0)  0.016000  Uiso  0.590000   8
   C19   0.33161(8)   1.18660(6)   0.64515(3)   0.011242  Uani  1.000000   0
  H19A   0.421727(0)  1.194344(0)  0.627472(0)  0.017000  Uiso  0.310000  13
  H19B   0.329805(0)  1.252966(0)  0.667963(0)  0.017000  Uiso  0.310000  13
  H19C   0.237973(0)  1.188396(0)  0.622529(0)  0.017000  Uiso  0.310000  13
  H19D   0.224102(0)  1.205676(0)  0.634434(0)  0.017000  Uiso  0.690000  14
  H19E   0.389177(0)  1.179754(0)  0.617147(0)  0.017000  Uiso  0.690000  14
  H19F   0.376259(0)  1.250336(0)  0.666302(0)  0.017000  Uiso  0.690000  14
   C20   0.10650(8)   1.09533(6)   0.70587(3)   0.011222  Uani  1.000000   0
  H20A   0.117033(0)  1.121292(0)  0.739518(0)  0.017000  Uiso  1.000000   0
  H20B   0.020449(0)  1.039201(0)  0.700294(0)  0.017000  Uiso  1.000000   0
  H20C   0.087090(0)  1.164971(0)  0.684811(0)  0.017000  Uiso  1.000000   0
   C16   0.22465(9)   0.87810(6)   0.74966(2)   0.012063  Uani  1.000000   0
  H16A   0.278216(0)  0.801593(0)  0.755314(0)  0.018000  Uiso  0.510000   9
  H16B   0.116675(0)  0.863292(0)  0.738038(0)  0.018000  Uiso  0.510000   9
  H16C   0.230987(0)  0.923525(0)  0.779764(0)  0.018000  Uiso  0.510000   9
  H16D   0.240071(0)  0.792416(0)  0.744546(0)  0.018000  Uiso  0.490000  10
  H16E   0.114391(0)  0.895607(0)  0.746787(0)  0.018000  Uiso  0.490000  10
  H16F   0.271209(0)  0.900399(0)  0.781865(0)  0.018000  Uiso  0.490000  10
    C4   0.13459(8)   0.85900(7)   0.55080(2)   0.012692  Uani  1.000000   0
    C3   0.10130(8)   0.96931(7)   0.55869(2)   0.012140  Uani  1.000000   0
    C2   0.00364(8)   0.97115(6)   0.58996(2)   0.008789  Uani  1.000000   0
    C1  -0.02058(8)   0.86201(6)   0.60228(2)   0.008572  Uani  1.000000   0
    C5   0.05917(8)   0.79263(6)   0.57762(2)   0.010836  Uani  1.000000   0
   C14   0.22294(10)  0.82021(9)   0.51655(3)   0.021484  Uani  1.000000   0
  H14A   0.156612(0)  0.787786(0)  0.489128(0)  0.032000  Uiso  0.400000  11
  H14B   0.293063(0)  0.757653(0)  0.530169(0)  0.032000  Uiso  0.400000  11
  H14C   0.282559(0)  0.887376(0)  0.505840(0)  0.032000  Uiso  0.400000  11
  H14D   0.159623(0)  0.814253(0)  0.485531(0)  0.032000  Uiso  0.600000  12
  H14E   0.265847(0)  0.741472(0)  0.525690(0)  0.032000  Uiso  0.600000  12
  H14F   0.306784(0)  0.877060(0)  0.513914(0)  0.032000  Uiso  0.600000  12
   C13   0.15257(9)   1.06646(8)   0.53541(3)   0.019510  Uani  1.000000   0
  H13A   0.120423(0)  1.059553(0)  0.500864(0)  0.029000  Uiso  0.330000  13
  H13B   0.264918(0)  1.069983(0)  0.540897(0)  0.029000  Uiso  0.330000  13
  H13C   0.109165(0)  1.139577(0)  0.547746(0)  0.029000  Uiso  0.330000  13
  H13D   0.088017(0)  1.078166(0)  0.504900(0)  0.029000  Uiso  0.670000  14
  H13E   0.259123(0)  1.053036(0)  0.529113(0)  0.029000  Uiso  0.670000  14
  H13F   0.147334(0)  1.137694(0)  0.555578(0)  0.029000  Uiso  0.670000  14
   C12  -0.07443(8)   1.06942(6)   0.60303(3)   0.011248  Uani  1.000000   0
  H12A  -0.005720(0)  1.138859(0)  0.605353(0)  0.017000  Uiso  1.000000   0
  H12B  -0.111661(0)  1.055143(0)  0.634312(0)  0.017000  Uiso  1.000000   0
  H12C  -0.161910(0)  1.084769(0)  0.578874(0)  0.017000  Uiso  1.000000   0
   C11  -0.11789(8)   0.82645(6)   0.63448(3)   0.011865  Uani  1.000000   0
  H11B  -0.076278(0)  0.755040(0)  0.651556(0)  0.018000  Uiso  1.000000   0
  H11A  -0.218717(0)  0.807891(0)  0.617345(0)  0.018000  Uiso  1.000000   0
  H11C  -0.128450(0)  0.890922(0)  0.657621(0)  0.018000  Uiso  1.000000   0
   C15   0.05208(9)   0.67059(7)   0.57643(3)   0.019310  Uani  1.000000   0
  H15C   0.046721(0)  0.639993(0)  0.609023(0)  0.029000  Uiso  1.000000   0
  H15B   0.144001(0)  0.638846(0)  0.563829(0)  0.029000  Uiso  1.000000   0
  H15A  -0.039598(0)  0.645459(0)  0.555632(0)  0.029000  Uiso  1.000000   0
   C27   0.82383(9)   0.42111(6)   0.66911(2)   0.010386  Uani  1.000000   0
   C28   0.95721(8)   0.45642(6)   0.65963(2)   0.009185  Uani  1.000000   0
   C29   0.98898(8)   0.55530(6)   0.68268(2)   0.011172  Uani  1.000000   0
   C30   0.87413(9)   0.58145(6)   0.70581(2)   0.012007  Uani  1.000000   0
   C26   0.77217(9)   0.49888(6)   0.69765(2)   0.012257  Uani  1.000000   0
   C37   0.75908(9)   0.31278(6)   0.65637(3)   0.015228  Uani  1.000000   0
  H37A   0.753045(0)  0.303156(0)  0.621406(0)  0.023000  Uiso  0.400000   5
  H37B   0.655555(0)  0.308988(0)  0.666500(0)  0.023000  Uiso  0.400000   5
  H37C   0.822235(0)  0.248661(0)  0.672103(0)  0.023000  Uiso  0.400000   5
  H37D   0.785358(0)  0.290250(0)  0.624426(0)  0.023000  Uiso  0.600000   6
  H37E   0.647215(0)  0.318414(0)  0.655730(0)  0.023000  Uiso  0.600000   6
  H37F   0.798360(0)  0.252122(0)  0.679846(0)  0.023000  Uiso  0.600000   6
   C38   1.04988(9)   0.39684(6)   0.63144(3)   0.013240  Uani  1.000000   0
  H38A   0.999869(0)  0.322306(0)  0.619840(0)  0.020000  Uiso  0.598000   3
  H38B   1.148106(0)  0.378501(0)  0.650250(0)  0.020000  Uiso  0.598000   3
  H38C   1.068180(0)  0.447031(0)  0.603922(0)  0.020000  Uiso  0.598000   3
  H38D   1.009800(0)  0.406317(0)  0.597566(0)  0.020000  Uiso  0.402000   4
  H38F   1.052373(0)  0.311688(0)  0.639816(0)  0.020000  Uiso  0.402000   4
  H38E   1.154051(0)  0.429791(0)  0.636670(0)  0.020000  Uiso  0.402000   4
   C39   1.12722(9)   0.61297(7)   0.68847(3)   0.019418  Uani  1.000000   0
  H39B   1.196348(0)  0.577194(0)  0.667175(0)  0.029000  Uiso  1.000000   0
  H39C   1.172518(0)  0.605376(0)  0.721933(0)  0.029000  Uiso  1.000000   0
  H39A   1.112060(0)  0.697772(0)  0.680430(0)  0.029000  Uiso  1.000000   0
   C40   0.87217(11)  0.67236(7)   0.73848(3)   0.018074  Uani  1.000000   0
  H40A   0.946464(0)  0.655354(0)  0.766434(0)  0.027000  Uiso  1.000000   0
  H40B   0.769039(0)  0.679253(0)  0.748718(0)  0.027000  Uiso  1.000000   0
  H40C   0.899590(0)  0.747718(0)  0.723687(0)  0.027000  Uiso  1.000000   0
   C36   0.64297(11)  0.48801(7)   0.72044(3)   0.020931  Uani  1.000000   0
  H36A   0.671690(0)  0.466036(0)  0.754124(0)  0.031000  Uiso  1.000000   0
  H36B   0.576626(0)  0.425776(0)  0.704671(0)  0.031000  Uiso  1.000000   0
  H36C   0.587709(0)  0.564379(0)  0.718937(0)  0.031000  Uiso  1.000000   0
   C22   0.52800(8)   0.66007(6)   0.58778(2)   0.008123  Uani  1.000000   0
  C25A   0.6018(2)    0.4941(2)    0.56213(7)   0.006656  Uani  0.496000   1
  C24A   0.66346(19)  0.5766(2)    0.53886(6)   0.006921  Uani  0.496000   1
  C23A   0.6200(4)    0.6788(2)    0.55343(11)  0.007235  Uani  0.496000   1
  C21A   0.5199(9)    0.5420(6)    0.5919(2)    0.006105  Uani  0.496000   1
  C35A   0.61021(19)  0.37447(13)  0.55207(6)   0.012000  Uani  0.496000   1
  H35C   0.557198(0)  0.328786(0)  0.575186(0)  0.018000  Uiso  0.496000   1
  H35A   0.718137(0)  0.349819(0)  0.554348(0)  0.018000  Uiso  0.496000   1
  H35B   0.561278(0)  0.359244(0)  0.519453(0)  0.018000  Uiso  0.496000   1
  C34A   0.74494(17)  0.55701(15)  0.50047(5)   0.014169  Uani  0.496000   1
  H34A   0.784504(0)  0.633299(0)  0.489732(0)  0.021000  Uiso  0.496000   1
  H34C   0.677614(0)  0.520667(0)  0.474152(0)  0.021000  Uiso  0.496000   1
  H34B   0.830948(0)  0.503034(0)  0.510152(0)  0.021000  Uiso  0.496000   1
  C33A   0.6486(2)    0.78748(18)  0.53435(7)   0.014119  Uani  0.496000   1
  H33C   0.614973(0)  0.850832(0)  0.555030(0)  0.021000  Uiso  0.496000   1
  H33A   0.592574(0)  0.794239(0)  0.502183(0)  0.021000  Uiso  0.496000   1
  H33B   0.759035(0)  0.795575(0)  0.532164(0)  0.021000  Uiso  0.496000   1
  C32A   0.4340(6)    0.7222(4)    0.61713(17)  0.008868  Uani  0.496000   1
  H32A   0.476284(0)  0.802281(0)  0.624050(0)  0.013000  Uiso  0.496000   1
  H32C   0.430415(0)  0.678505(0)  0.647347(0)  0.013000  Uiso  0.496000   1
  H32B   0.329966(0)  0.729046(0)  0.600487(0)  0.013000  Uiso  0.496000   1
  C31A   0.4254(2)    0.48771(19)  0.62089(8)   0.010657  Uani  0.496000   1
  H31A   0.424951(0)  0.533473(0)  0.650744(0)  0.016000  Uiso  0.496000   1
  H31C   0.462299(0)  0.406386(0)  0.628416(0)  0.016000  Uiso  0.496000   1
  H31B   0.321006(0)  0.484111(0)  0.604306(0)  0.016000  Uiso  0.496000   1
  C25B   0.6208(2)    0.5225(2)    0.55228(8)   0.008006  Uani  0.504000   2
  C24B   0.6724(2)    0.6216(2)    0.53761(6)   0.008018  Uani  0.504000   2
  C23B   0.6131(4)    0.7080(2)    0.55948(11)  0.007717  Uani  0.504000   2
  C21B   0.5280(10)   0.5482(7)    0.5841(2)    0.008861  Uani  0.504000   2
  C35B   0.64916(19)  0.41118(14)  0.53456(6)   0.012876  Uani  0.504000   2
  H35D   0.611766(0)  0.349887(0)  0.555454(0)  0.019000  Uiso  0.504000   2
  H35F   0.759932(0)  0.401106(0)  0.533595(0)  0.019000  Uiso  0.504000   2
  H35E   0.596080(0)  0.403116(0)  0.502033(0)  0.019000  Uiso  0.504000   2
  C34B   0.75772(18)  0.63509(14)  0.49969(5)   0.013685  Uani  0.504000   2
  H34F   0.825219(0)  0.704754(0)  0.505309(0)  0.021000  Uiso  0.504000   2
  H34E   0.689008(0)  0.646867(0)  0.470007(0)  0.021000  Uiso  0.504000   2
  H34D   0.820104(0)  0.563266(0)  0.496671(0)  0.021000  Uiso  0.504000   2
  C33B   0.62686(18)  0.82665(16)  0.54836(6)   0.010852  Uani  0.504000   2
  H33E   0.735658(0)  0.846775(0)  0.548068(0)  0.016000  Uiso  0.504000   2
  H33D   0.582673(0)  0.875653(0)  0.572429(0)  0.016000  Uiso  0.504000   2
  H33F   0.572061(0)  0.842408(0)  0.516553(0)  0.016000  Uiso  0.504000   2
  C32B   0.4510(6)    0.7407(4)    0.61042(18)  0.012324  Uani  0.504000   2
  H32D   0.465591(0)  0.725099(0)  0.645079(0)  0.018000  Uiso  0.504000   2
  H32E   0.341485(0)  0.735651(0)  0.598840(0)  0.018000  Uiso  0.504000   2
  H32F   0.489132(0)  0.820889(0)  0.604005(0)  0.018000  Uiso  0.504000   2
  C31B   0.4375(2)    0.46971(17)  0.60611(8)   0.011293  Uani  0.504000   2
  H31D   0.476524(0)  0.388175(0)  0.603183(0)  0.017000  Uiso  0.504000   2
  H31F   0.331767(0)  0.474296(0)  0.590626(0)  0.017000  Uiso  0.504000   2
  H31E   0.439518(0)  0.490556(0)  0.640189(0)  0.017000  Uiso  0.504000   2
   Ca1   0.24169(2)   0.90181(2)   0.63199(2)   0.007008  Uani  1.000000   0
   Ca2   0.77909(2)   0.59527(2)   0.62093(2)   0.006641  Uani  1.000000   0
 
loop_
    _atom_site_aniso_label
    _atom_site_aniso_U_11
    _atom_site_aniso_U_22
    _atom_site_aniso_U_33
    _atom_site_aniso_U_23
    _atom_site_aniso_U_13
    _atom_site_aniso_U_12
C7 0.0086(3) 0.0063(3) 0.0078(3) -0.0004(2) -0.0004(2) 0.0002(2)
C8 0.0072(3) 0.0064(3) 0.0086(3) -0.0010(2) 0.0007(2) -0.0001(2)
C9 0.0087(3) 0.0054(3) 0.0084(3) -0.0004(2) 0.0009(2) 0.0004(2)
C10 0.0081(3) 0.0081(3) 0.0079(3) -0.0008(2) 0.0013(2) 0.0012(2)
C6 0.0097(3) 0.0083(3) 0.0067(3) 0.0001(2) 0.0009(2) -0.0002(2)
C17 0.0118(3) 0.0081(3) 0.0110(3) 0.0002(2) -0.0012(2) 0.0024(2)
C18 0.0089(3) 0.0094(3) 0.0146(3) -0.0010(2) 0.0035(2) -0.0004(2)
C19 0.0139(3) 0.0072(3) 0.0129(3) 0.0019(2) 0.0027(3) 0.0017(2)
C20 0.0099(3) 0.0130(3) 0.0110(3) -0.0014(2) 0.0022(3) 0.0024(2)
C16 0.0157(4) 0.0112(3) 0.0098(3) 0.0016(2) 0.0037(3) -0.0015(3)
C4 0.0094(3) 0.0225(4) 0.0061(3) -0.0012(3) 0.0005(2) 0.0036(3)
C3 0.0096(3) 0.0192(4) 0.0077(3) 0.0044(3) 0.0013(2) 0.0026(3)
C2 0.0078(3) 0.0106(3) 0.0078(3) 0.0011(2) 0.0001(2) 0.0002(2)
C1 0.0077(3) 0.0090(3) 0.0091(3) -0.0024(2) 0.0013(2) -0.0009(2)
C5 0.0086(3) 0.0131(3) 0.0106(3) -0.0055(3) 0.0001(2) 0.0007(3)
C14 0.0175(4) 0.0391(5) 0.0084(3) -0.0008(3) 0.0039(3) 0.0116(4)
C13 0.0132(4) 0.0295(4) 0.0164(4) 0.0141(3) 0.0042(3) 0.0022(3)
C12 0.0112(3) 0.0100(3) 0.0125(3) 0.0021(2) 0.0011(3) 0.0016(3)
C11 0.0115(3) 0.0074(3) 0.0178(3) -0.0005(3) 0.0066(3) -0.0009(2)
C15 0.0125(4) 0.0153(4) 0.0308(5) -0.0149(3) 0.0054(3) -0.0033(3)
C27 0.0171(4) 0.0051(3) 0.0095(3) 0.0011(2) 0.0039(3) 0.0009(2)
C28 0.0126(3) 0.0058(3) 0.0087(3) -0.0002(2) -0.0009(2) 0.0022(2)
C29 0.0135(3) 0.0072(3) 0.0115(3) -0.0020(2) -0.0046(3) 0.0027(2)
C30 0.0208(4) 0.0078(3) 0.0068(3) -0.0002(2) -0.0013(3) 0.0049(3)
C26 0.0210(4) 0.0076(3) 0.0092(3) 0.0021(2) 0.0063(3) 0.0034(3)
C37 0.0192(4) 0.0064(3) 0.0218(4) -0.0007(3) 0.0100(3) -0.0018(3)
C38 0.0129(4) 0.0088(3) 0.0180(4) -0.0036(3) 0.0016(3) 0.0025(3)
C39 0.0137(4) 0.0111(3) 0.0306(5) -0.0073(3) -0.0105(3) 0.0031(3)
C40 0.0334(5) 0.0113(3) 0.0084(3) -0.0029(3) -0.0028(3) 0.0080(3)
C36 0.0340(5) 0.0120(3) 0.0204(4) 0.0039(3) 0.0193(4) 0.0043(3)
C22 0.0085(3) 0.0074(3) 0.0082(3) -0.0003(2) -0.0003(2) 0.0004(2)
C25A 0.0074(8) 0.0049(10) 0.0074(9) -0.0001(7) -0.0004(6) -0.0002(7)
C24A 0.0085(7) 0.0067(9) 0.0057(7) -0.0008(8) 0.0014(5) -0.0002(8)
C23A 0.0092(9) 0.0063(13) 0.0060(11) 0.0016(9) -0.0001(8) -0.0018(11)
C21A 0.0071(12) 0.0031(13) 0.008(2) 0.0002(12) 0.0003(12) 0.0018(9)
C35A 0.0151(8) 0.0069(6) 0.0135(7) -0.0038(6) -0.0007(6) 0.0019(6)
C34A 0.0105(7) 0.0242(9) 0.0082(6) -0.0036(6) 0.0028(5) -0.0017(6)
C33A 0.0172(8) 0.0101(8) 0.0138(8) 0.0038(7) -0.0040(6) -0.0038(6)
C32A 0.0092(13) 0.0071(14) 0.0104(15) -0.0021(9) 0.0015(9) 0.0005(10)
C31A 0.0101(8) 0.0129(9) 0.0094(10) 0.0010(7) 0.0030(7) -0.0021(6)
C25B 0.0109(9) 0.0057(11) 0.0072(9) -0.0011(7) 0.0000(7) 0.0013(8)
C24B 0.0099(7) 0.0075(9) 0.0065(7) 0.0004(7) 0.0002(5) 0.0007(8)
C23B 0.0081(8) 0.0086(13) 0.0063(10) -0.0021(9) 0.0001(6) 0.0021(10)
C21B 0.0090(13) 0.0081(11) 0.009(2) 0.0040(12) -0.0012(13) -0.0042(8)
C35B 0.0142(8) 0.0096(7) 0.0142(8) -0.0047(6) -0.0013(6) 0.0027(6)
C34B 0.0139(7) 0.0197(9) 0.0079(6) 0.0003(5) 0.0032(5) 0.0024(6)
C33B 0.0131(7) 0.0079(7) 0.0117(7) 0.0027(6) 0.0020(6) -0.0001(6)
C32B 0.0122(16) 0.0110(17) 0.0132(16) -0.0035(11) -0.0012(10) 0.0038(11)
C31B 0.0116(8) 0.0101(8) 0.0122(10) 0.0001(7) 0.0014(7) -0.0011(6)
Ca1 0.00731(7) 0.00636(7) 0.00708(7) -0.00039(4) -0.00046(5) -0.00009(4)
Ca2 0.00720(7) 0.00642(7) 0.00617(7) 0.00022(4) 0.00013(5) -0.00022(4)
 
 
#----------------------------------------------------------------------------#
#                   MOLECULAR GEOMETRY                                       #
#----------------------------------------------------------------------------#
 
_geom_special_details
;
 All esds (except the esd in the dihedral angle between two l.s. planes)
 are estimated using the full covariance matrix.  The cell esds are taken
 into account individually in the estimation of esds in distances, angles
 and torsion angles; correlations between esds in cell parameters are only
 used when they are defined by crystal symmetry.  An approximate (isotropic)
 treatment of cell esds is used for estimating esds involving l.s. planes.
;
loop_
    _geom_bond_atom_site_label_1
    _geom_bond_atom_site_label_2
    _geom_bond_distance
    _geom_bond_site_symmetry_2
C7 C6 1.4164(10) . 
C7 C8 1.4211(10) . 
C7 C17 1.5007(10) . 
C7 Ca1 2.6476(7) . 
C8 C9 1.4217(10) . 
C8 C18 1.5008(10) . 
C8 Ca1 2.6313(7) . 
C9 C10 1.4178(10) . 
C9 C19 1.5009(10) . 
C9 Ca1 2.6105(7) . 
C10 C6 1.4215(10) . 
C10 C20 1.5008(10) . 
C10 Ca1 2.6058(7) . 
C6 C16 1.5019(10) . 
C6 Ca1 2.6224(7) . 
C17 H17A 1.077 . 
C17 H17B 1.077 . 
C17 H17C 1.077 . 
C18 H18A 1.077 . 
C18 H18B 1.077 . 
C18 H18C 1.077 . 
C18 H18E 1.077 . 
C18 H18F 1.077 . 
C18 H18D 1.077 . 
C19 H19A 1.077 . 
C19 H19B 1.077 . 
C19 H19C 1.077 . 
C19 H19D 1.077 . 
C19 H19E 1.077 . 
C19 H19F 1.077 . 
C20 H20A 1.077 . 
C20 H20B 1.077 . 
C20 H20C 1.077 . 
C16 H16A 1.077 . 
C16 H16B 1.077 . 
C16 H16C 1.077 . 
C16 H16D 1.077 . 
C16 H16E 1.077 . 
C16 H16F 1.077 . 
C4 C5 1.4151(11) . 
C4 C3 1.4195(12) . 
C4 C14 1.5019(11) . 
C4 Ca1 2.6478(8) . 
C3 C2 1.4164(10) . 
C3 C13 1.5027(12) . 
C3 Ca1 2.6324(8) . 
C2 C1 1.4195(10) . 
C2 C12 1.4998(10) . 
C2 Ca1 2.6457(7) . 
C1 C5 1.4205(10) . 
C1 C11 1.5002(10) . 
C1 Ca1 2.6349(8) . 
C5 C15 1.5011(11) . 
C5 Ca1 2.6533(8) . 
C14 H14A 1.077 . 
C14 H14B 1.077 . 
C14 H14C 1.077 . 
C14 H14D 1.077 . 
C14 H14E 1.077 . 
C14 H14F 1.077 . 
C13 H13A 1.077 . 
C13 H13B 1.077 . 
C13 H13C 1.077 . 
C13 H13D 1.077 . 
C13 H13E 1.077 . 
C13 H13F 1.077 . 
C12 H12A 1.077 . 
C12 H12B 1.077 . 
C12 H12C 1.077 . 
C11 Ca2 3.0221(8) 1_455 
C11 H11B 1.077 . 
C11 H11A 1.077 . 
C11 H11C 1.077 . 
C15 Ca2 3.2278(9) 1_455 
C15 H15C 1.077 . 
C15 H15B 1.077 . 
C15 H15A 1.077 . 
C27 C28 1.4153(11) . 
C27 C26 1.4233(10) . 
C27 C37 1.5032(11) . 
C27 Ca2 2.6114(7) . 
C28 C29 1.4228(10) . 
C28 C38 1.5006(11) . 
C28 Ca2 2.6116(7) . 
C29 C30 1.4153(11) . 
C29 C39 1.5008(12) . 
C29 Ca2 2.6629(8) . 
C30 C26 1.4146(12) . 
C30 C40 1.5038(11) . 
C30 Ca2 2.6756(8) . 
C26 C36 1.4986(12) . 
C26 Ca2 2.6472(7) . 
C37 H37A 1.077 . 
C37 H37B 1.077 . 
C37 H37C 1.077 . 
C37 H37D 1.077 . 
C37 H37E 1.077 . 
C37 H37F 1.077 . 
C38 H38A 1.077 . 
C38 H38B 1.077 . 
C38 H38C 1.077 . 
C38 H38D 1.077 . 
C38 H38F 1.077 . 
C38 H38E 1.077 . 
C39 H39B 1.077 . 
C39 H39C 1.077 . 
C39 H39A 1.077 . 
C40 H40A 1.077 . 
C40 H40B 1.077 . 
C40 H40C 1.077 . 
C36 H36A 1.077 . 
C36 H36B 1.077 . 
C36 H36C 1.077 . 
C22 C21B 1.379(9) . 
C22 C23B 1.389(4) . 
C22 C21A 1.459(8) . 
C22 C32B 1.459(6) . 
C22 C23A 1.468(4) . 
C22 C32A 1.547(5) . 
C22 Ca2 2.6413(7) . 
C25A C21A 1.402(7) . 
C25A C24A 1.409(3) . 
C25A C35A 1.506(3) . 
C25A Ca2 2.655(2) . 
C24A C23A 1.411(3) . 
C24A C34A 1.506(2) . 
C24A Ca2 2.6550(17) . 
C23A C33A 1.497(4) . 
C23A Ca2 2.648(4) . 
C21A C31A 1.498(7) . 
C21A Ca2 2.639(9) . 
C35A H35C 1.077 . 
C35A H35A 1.077 . 
C35A H35B 1.077 . 
C34A H34A 1.077 . 
C34A H34C 1.077 . 
C34A H34B 1.077 . 
C33A H33C 1.077 . 
C33A H33A 1.077 . 
C33A H33B 1.077 . 
C32A Ca1 2.948(6) . 
C32A H32A 1.077 . 
C32A H32C 1.077 . 
C32A H32B 1.077 . 
C31A H31A 1.077 . 
C31A H31C 1.077 . 
C31A H31B 1.077 . 
C25B C24B 1.408(3) . 
C25B C21B 1.432(7) . 
C25B C35B 1.508(3) . 
C25B Ca2 2.622(2) . 
C24B C23B 1.411(3) . 
C24B C34B 1.507(3) . 
C24B Ca2 2.6743(18) . 
C23B C33B 1.506(4) . 
C23B Ca2 2.718(4) . 
C21B C31B 1.508(7) . 
C21B Ca2 2.619(10) . 
C35B H35D 1.077 . 
C35B H35F 1.077 . 
C35B H35E 1.077 . 
C34B H34F 1.077 . 
C34B H34E 1.077 . 
C34B H34D 1.077 . 
C33B H33E 1.077 . 
C33B H33D 1.077 . 
C33B H33F 1.077 . 
C32B Ca1 2.951(6) . 
C32B H32D 1.077 . 
C32B H32E 1.077 . 
C32B H32F 1.077 . 
C31B H31D 1.077 . 
C31B H31F 1.077 . 
C31B H31E 1.077 . 
 
loop_
    _geom_angle_atom_site_label_1
    _geom_angle_atom_site_label_2
    _geom_angle_atom_site_label_3
    _geom_angle
    _geom_angle_site_symmetry_1
    _geom_angle_site_symmetry_3
C6 C7 C8 107.91(6) . . 
C6 C7 C17 125.48(7) . . 
C8 C7 C17 126.09(7) . . 
C6 C7 Ca1 73.43(4) . . 
C8 C7 Ca1 73.75(4) . . 
C17 C7 Ca1 125.14(5) . . 
C7 C8 C9 108.05(6) . . 
C7 C8 C18 125.87(7) . . 
C9 C8 C18 125.82(6) . . 
C7 C8 Ca1 75.02(4) . . 
C9 C8 Ca1 73.45(4) . . 
C18 C8 Ca1 122.05(5) . . 
C10 C9 C8 107.90(6) . . 
C10 C9 C19 126.46(7) . . 
C8 C9 C19 125.45(7) . . 
C10 C9 Ca1 74.04(4) . . 
C8 C9 Ca1 75.07(4) . . 
C19 C9 Ca1 120.79(5) . . 
C9 C10 C6 108.01(6) . . 
C9 C10 C20 126.99(7) . . 
C6 C10 C20 124.70(7) . . 
C9 C10 Ca1 74.41(4) . . 
C6 C10 Ca1 74.87(4) . . 
C20 C10 Ca1 121.71(5) . . 
C7 C6 C10 108.13(6) . . 
C7 C6 C16 126.15(7) . . 
C10 C6 C16 125.38(7) . . 
C7 C6 Ca1 75.39(4) . . 
C10 C6 Ca1 73.58(4) . . 
C16 C6 Ca1 122.26(5) . . 
C7 C17 H17A 109.5 . . 
C7 C17 H17B 109.5 . . 
H17A C17 H17B 109.5 . . 
C7 C17 H17C 109.5 . . 
H17A C17 H17C 109.5 . . 
H17B C17 H17C 109.5 . . 
C8 C18 H18A 109.5 . . 
C8 C18 H18B 109.5 . . 
H18A C18 H18B 109.5 . . 
C8 C18 H18C 109.5 . . 
H18A C18 H18C 109.5 . . 
H18B C18 H18C 109.5 . . 
C8 C18 H18E 109.5 . . 
C8 C18 H18F 109.5 . . 
H18E C18 H18F 109.5 . . 
C8 C18 H18D 109.5 . . 
H18E C18 H18D 109.5 . . 
H18F C18 H18D 109.5 . . 
C9 C19 H19A 109.5 . . 
C9 C19 H19B 109.5 . . 
H19A C19 H19B 109.5 . . 
C9 C19 H19C 109.5 . . 
H19A C19 H19C 109.5 . . 
H19B C19 H19C 109.5 . . 
C9 C19 H19D 109.5 . . 
C9 C19 H19E 109.5 . . 
H19D C19 H19E 109.5 . . 
C9 C19 H19F 109.5 . . 
H19D C19 H19F 109.5 . . 
H19E C19 H19F 109.5 . . 
C10 C20 H20A 109.5 . . 
C10 C20 H20B 109.5 . . 
H20A C20 H20B 109.5 . . 
C10 C20 H20C 109.5 . . 
H20A C20 H20C 109.5 . . 
H20B C20 H20C 109.5 . . 
C6 C16 H16A 109.5 . . 
C6 C16 H16B 109.5 . . 
H16A C16 H16B 109.5 . . 
C6 C16 H16C 109.5 . . 
H16A C16 H16C 109.5 . . 
H16B C16 H16C 109.5 . . 
C6 C16 H16D 109.5 . . 
C6 C16 H16E 109.5 . . 
H16D C16 H16E 109.5 . . 
C6 C16 H16F 109.5 . . 
H16D C16 H16F 109.5 . . 
H16E C16 H16F 109.5 . . 
C5 C4 C3 108.10(7) . . 
C5 C4 C14 126.28(8) . . 
C3 C4 C14 125.35(8) . . 
C5 C4 Ca1 74.73(4) . . 
C3 C4 Ca1 73.80(4) . . 
C14 C4 Ca1 122.17(6) . . 
C2 C3 C4 108.08(7) . . 
C2 C3 C13 125.99(8) . . 
C4 C3 C13 125.79(7) . . 
C2 C3 Ca1 74.95(4) . . 
C4 C3 Ca1 75.01(4) . . 
C13 C3 Ca1 119.58(6) . . 
C3 C2 C1 107.85(7) . . 
C3 C2 C12 125.72(7) . . 
C1 C2 C12 125.96(7) . . 
C3 C2 Ca1 73.92(4) . . 
C1 C2 Ca1 73.99(4) . . 
C12 C2 Ca1 124.11(5) . . 
C2 C1 C5 108.08(7) . . 
C2 C1 C11 125.71(7) . . 
C5 C1 C11 126.18(7) . . 
C2 C1 Ca1 74.82(4) . . 
C5 C1 Ca1 75.13(4) . . 
C11 C1 Ca1 117.95(5) . . 
C4 C5 C1 107.87(7) . . 
C4 C5 C15 125.88(7) . . 
C1 C5 C15 125.91(7) . . 
C4 C5 Ca1 74.30(4) . . 
C1 C5 Ca1 73.70(4) . . 
C15 C5 Ca1 123.06(6) . . 
C4 C14 H14A 109.5 . . 
C4 C14 H14B 109.5 . . 
H14A C14 H14B 109.5 . . 
C4 C14 H14C 109.5 . . 
H14A C14 H14C 109.5 . . 
H14B C14 H14C 109.5 . . 
C4 C14 H14D 109.5 . . 
C4 C14 H14E 109.5 . . 
H14D C14 H14E 109.5 . . 
C4 C14 H14F 109.5 . . 
H14D C14 H14F 109.5 . . 
H14E C14 H14F 109.5 . . 
C3 C13 H13A 109.5 . . 
C3 C13 H13B 109.5 . . 
H13A C13 H13B 109.5 . . 
C3 C13 H13C 109.5 . . 
H13A C13 H13C 109.5 . . 
H13B C13 H13C 109.5 . . 
C3 C13 H13D 109.5 . . 
C3 C13 H13E 109.5 . . 
H13D C13 H13E 109.5 . . 
C3 C13 H13F 109.5 . . 
H13D C13 H13F 109.5 . . 
H13E C13 H13F 109.5 . . 
C2 C12 H12A 109.5 . . 
C2 C12 H12B 109.5 . . 
H12A C12 H12B 109.5 . . 
C2 C12 H12C 109.5 . . 
H12A C12 H12C 109.5 . . 
H12B C12 H12C 109.5 . . 
C1 C11 Ca2 113.69(5) . 1_455 
C1 C11 H11B 109.5 . . 
Ca2 C11 H11B 53.2 1_455 . 
C1 C11 H11A 109.5 . . 
Ca2 C11 H11A 57.9 1_455 . 
H11B C11 H11A 109.5 . . 
C1 C11 H11C 109.5 . . 
Ca2 C11 H11C 136.8 1_455 . 
H11B C11 H11C 109.5 . . 
H11A C11 H11C 109.5 . . 
C5 C15 Ca2 108.24(5) . 1_455 
C5 C15 H15C 109.5 . . 
Ca2 C15 H15C 51.8 1_455 . 
C5 C15 H15B 109.5 . . 
Ca2 C15 H15B 142 1_455 . 
H15C C15 H15B 109.5 . . 
C5 C15 H15A 109.5 . . 
Ca2 C15 H15A 61.2 1_455 . 
H15C C15 H15A 109.5 . . 
H15B C15 H15A 109.5 . . 
C28 C27 C26 107.88(7) . . 
C28 C27 C37 125.26(7) . . 
C26 C27 C37 126.31(7) . . 
C28 C27 Ca2 74.28(4) . . 
C26 C27 Ca2 75.69(4) . . 
C37 C27 Ca2 122.64(5) . . 
C27 C28 C29 108.03(7) . . 
C27 C28 C38 125.40(7) . . 
C29 C28 C38 126.54(7) . . 
C27 C28 Ca2 74.27(4) . . 
C29 C28 Ca2 76.35(4) . . 
C38 C28 Ca2 117.22(5) . . 
C30 C29 C28 107.88(7) . . 
C30 C29 C39 124.34(7) . . 
C28 C29 C39 127.00(7) . . 
C30 C29 Ca2 75.12(4) . . 
C28 C29 Ca2 72.37(4) . . 
C39 C29 Ca2 126.26(6) . . 
C26 C30 C29 108.23(7) . . 
C26 C30 C40 126.30(8) . . 
C29 C30 C40 124.88(8) . . 
C26 C30 Ca2 73.48(4) . . 
C29 C30 Ca2 74.13(4) . . 
C40 C30 Ca2 125.23(5) . . 
C30 C26 C27 107.97(7) . . 
C30 C26 C36 125.17(7) . . 
C27 C26 C36 126.31(7) . . 
C30 C26 Ca2 75.70(4) . . 
C27 C26 Ca2 72.91(4) . . 
C36 C26 Ca2 124.03(6) . . 
C27 C37 H37A 109.5 . . 
C27 C37 H37B 109.5 . . 
H37A C37 H37B 109.5 . . 
C27 C37 H37C 109.5 . . 
H37A C37 H37C 109.5 . . 
H37B C37 H37C 109.5 . . 
C27 C37 H37D 109.5 . . 
C27 C37 H37E 109.5 . . 
H37D C37 H37E 109.5 . . 
C27 C37 H37F 109.5 . . 
H37D C37 H37F 109.5 . . 
H37E C37 H37F 109.5 . . 
C28 C38 H38A 109.5 . . 
C28 C38 H38B 109.5 . . 
H38A C38 H38B 109.5 . . 
C28 C38 H38C 109.5 . . 
H38A C38 H38C 109.5 . . 
H38B C38 H38C 109.5 . . 
C28 C38 H38D 109.5 . . 
C28 C38 H38F 109.5 . . 
H38D C38 H38F 109.5 . . 
C28 C38 H38E 109.5 . . 
H38D C38 H38E 109.5 . . 
H38F C38 H38E 109.5 . . 
C29 C39 H39B 109.5 . . 
C29 C39 H39C 109.5 . . 
H39B C39 H39C 109.5 . . 
C29 C39 H39A 109.5 . . 
H39B C39 H39A 109.5 . . 
H39C C39 H39A 109.5 . . 
C30 C40 H40A 109.5 . . 
C30 C40 H40B 109.5 . . 
H40A C40 H40B 109.5 . . 
C30 C40 H40C 109.5 . . 
H40A C40 H40C 109.5 . . 
H40B C40 H40C 109.5 . . 
C26 C36 H36A 109.5 . . 
C26 C36 H36B 109.5 . . 
H36A C36 H36B 109.5 . . 
C26 C36 H36C 109.5 . . 
H36A C36 H36C 109.5 . . 
H36B C36 H36C 109.5 . . 
C21B C22 C23B 111.5(3) . . 
C21B C22 C32B 136.0(3) . . 
C23B C22 C32B 112.1(2) . . 
C21A C22 C23A 105.1(3) . . 
C21A C22 C32A 113.5(3) . . 
C23A C22 C32A 141.19(19) . . 
C21B C22 Ca2 73.9(4) . . 
C23B C22 Ca2 78.04(16) . . 
C21A C22 Ca2 73.9(4) . . 
C32B C22 Ca2 120.8(2) . . 
C23A C22 Ca2 74.14(15) . . 
C32A C22 Ca2 119.5(2) . . 
C21A C25A C24A 109.1(3) . . 
C21A C25A C35A 126.2(4) . . 
C24A C25A C35A 124.2(2) . . 
C21A C25A Ca2 74.0(4) . . 
C24A C25A Ca2 74.60(11) . . 
C35A C25A Ca2 123.49(14) . . 
C25A C24A C23A 108.8(2) . . 
C25A C24A C34A 124.6(2) . . 
C23A C24A C34A 126.1(2) . . 
C25A C24A Ca2 74.64(11) . . 
C23A C24A Ca2 74.30(16) . . 
C34A C24A Ca2 123.97(12) . . 
C24A C23A C22 108.2(2) . . 
C24A C23A C33A 126.5(3) . . 
C22 C23A C33A 125.0(2) . . 
C24A C23A Ca2 74.83(16) . . 
C22 C23A Ca2 73.63(14) . . 
C33A C23A Ca2 122.5(2) . . 
C25A C21A C22 108.7(4) . . 
C25A C21A C31A 128.5(6) . . 
C22 C21A C31A 122.4(5) . . 
C25A C21A Ca2 75.3(4) . . 
C22 C21A Ca2 74.1(4) . . 
C31A C21A Ca2 121.5(4) . . 
C25A C35A H35C 109.5 . . 
C25A C35A H35A 109.5 . . 
H35C C35A H35A 109.5 . . 
C25A C35A H35B 109.5 . . 
H35C C35A H35B 109.5 . . 
H35A C35A H35B 109.5 . . 
C24A C34A H34A 109.5 . . 
C24A C34A H34C 109.5 . . 
H34A C34A H34C 109.5 . . 
C24A C34A H34B 109.5 . . 
H34A C34A H34B 109.5 . . 
H34C C34A H34B 109.5 . . 
C23A C33A H33C 109.5 . . 
C23A C33A H33A 109.5 . . 
H33C C33A H33A 109.5 . . 
C23A C33A H33B 109.5 . . 
H33C C33A H33B 109.5 . . 
H33A C33A H33B 109.5 . . 
C22 C32A Ca1 151.2(2) . . 
C22 C32A H32A 109.5 . . 
Ca1 C32A H32A 61 . . 
C22 C32A H32C 109.5 . . 
Ca1 C32A H32C 99.2 . . 
H32A C32A H32C 109.5 . . 
C22 C32A H32B 109.5 . . 
Ca1 C32A H32B 56.5 . . 
H32A C32A H32B 109.5 . . 
H32C C32A H32B 109.5 . . 
C21A C31A H31A 109.5 . . 
C21A C31A H31C 109.5 . . 
H31A C31A H31C 109.5 . . 
C21A C31A H31B 109.5 . . 
H31A C31A H31B 109.5 . . 
H31C C31A H31B 109.5 . . 
C24B C25B C21B 107.2(4) . . 
C24B C25B C35B 125.8(2) . . 
C21B C25B C35B 126.8(4) . . 
C24B C25B Ca2 76.64(11) . . 
C21B C25B Ca2 74.0(4) . . 
C35B C25B Ca2 119.23(13) . . 
C25B C24B C23B 108.9(2) . . 
C25B C24B C34B 125.8(2) . . 
C23B C24B C34B 124.7(3) . . 
C25B C24B Ca2 72.55(11) . . 
C23B C24B Ca2 76.54(16) . . 
C34B C24B Ca2 124.74(12) . . 
C22 C23B C24B 106.0(2) . . 
C22 C23B C33B 128.7(2) . . 
C24B C23B C33B 124.7(3) . . 
C22 C23B Ca2 71.95(15) . . 
C24B C23B Ca2 73.14(15) . . 
C33B C23B Ca2 126.3(2) . . 
C22 C21B C25B 106.3(5) . . 
C22 C21B C31B 126.6(6) . . 
C25B C21B C31B 126.8(6) . . 
C22 C21B Ca2 75.7(4) . . 
C25B C21B Ca2 74.3(4) . . 
C31B C21B Ca2 119.9(4) . . 
C25B C35B H35D 109.5 . . 
C25B C35B H35F 109.5 . . 
H35D C35B H35F 109.5 . . 
C25B C35B H35E 109.5 . . 
H35D C35B H35E 109.5 . . 
H35F C35B H35E 109.5 . . 
C24B C34B H34F 109.5 . . 
C24B C34B H34E 109.5 . . 
H34F C34B H34E 109.5 . . 
C24B C34B H34D 109.5 . . 
H34F C34B H34D 109.5 . . 
H34E C34B H34D 109.5 . . 
C23B C33B H33E 109.5 . . 
C23B C33B H33D 109.5 . . 
H33E C33B H33D 109.5 . . 
C23B C33B H33F 109.5 . . 
H33E C33B H33F 109.5 . . 
H33D C33B H33F 109.5 . . 
C22 C32B Ca1 163.3(4) . . 
C22 C32B H32D 109.5 . . 
Ca1 C32B H32D 85.1 . . 
C22 C32B H32E 109.5 . . 
Ca1 C32B H32E 56.3 . . 
H32D C32B H32E 109.5 . . 
C22 C32B H32F 109.5 . . 
Ca1 C32B H32F 71.4 . . 
H32D C32B H32F 109.5 . . 
H32E C32B H32F 109.5 . . 
C21B C31B H31D 109.5 . . 
C21B C31B H31F 109.5 . . 
H31D C31B H31F 109.5 . . 
C21B C31B H31E 109.5 . . 
H31D C31B H31E 109.5 . . 
H31F C31B H31E 109.5 . . 
C10 Ca1 C9 31.54(2) . . 
C10 Ca1 C6 31.55(2) . . 
C9 Ca1 C6 52.08(2) . . 
C10 Ca1 C8 52.00(2) . . 
C9 Ca1 C8 31.47(2) . . 
C6 Ca1 C8 51.78(2) . . 
C10 Ca1 C3 113.28(2) . . 
C9 Ca1 C3 103.92(2) . . 
C6 Ca1 C3 143.71(2) . . 
C8 Ca1 C3 123.85(2) . . 
C10 Ca1 C1 107.11(2) . . 
C9 Ca1 C1 126.43(2) . . 
C6 Ca1 C1 116.29(2) . . 
C8 Ca1 C1 157.53(2) . . 
C3 Ca1 C1 51.59(2) . . 
C10 Ca1 C2 94.53(2) . . 
C9 Ca1 C2 101.26(2) . . 
C6 Ca1 C2 118.48(2) . . 
C8 Ca1 C2 131.52(2) . . 
C3 Ca1 C2 31.13(2) . . 
C1 Ca1 C2 31.19(2) . . 
C10 Ca1 C4 143.87(2) . . 
C9 Ca1 C4 132.04(3) . . 
C6 Ca1 C4 167.71(2) . . 
C8 Ca1 C4 139.07(2) . . 
C3 Ca1 C4 31.19(3) . . 
C1 Ca1 C4 51.43(2) . . 
C2 Ca1 C4 51.40(2) . . 
C10 Ca1 C7 51.87(2) . . 
C9 Ca1 C7 51.89(2) . . 
C6 Ca1 C7 31.18(2) . . 
C8 Ca1 C7 31.23(2) . . 
C3 Ca1 C7 154.48(3) . . 
C1 Ca1 C7 146.01(2) . . 
C2 Ca1 C7 146.38(2) . . 
C4 Ca1 C7 160.73(2) . . 
C10 Ca1 C5 138.20(2) . . 
C9 Ca1 C5 152.39(2) . . 
C6 Ca1 C5 138.95(2) . . 
C8 Ca1 C5 168.68(2) . . 
C3 Ca1 C5 51.46(3) . . 
C1 Ca1 C5 31.16(2) . . 
C2 Ca1 C5 51.42(2) . . 
C4 Ca1 C5 30.97(2) . . 
C7 Ca1 C5 154.01(2) . . 
C10 Ca1 C32A 131.65(12) . . 
C9 Ca1 C32A 119.88(11) . . 
C6 Ca1 C32A 104.04(11) . . 
C8 Ca1 C32A 88.66(12) . . 
C3 Ca1 C32A 112.05(11) . . 
C1 Ca1 C32A 113.67(11) . . 
C2 Ca1 C32A 133.66(12) . . 
C4 Ca1 C32A 83.78(12) . . 
C7 Ca1 C32A 79.82(12) . . 
C5 Ca1 C32A 84.71(12) . . 
C10 Ca1 C32B 132.21(12) . . 
C9 Ca1 C32B 116.36(11) . . 
C6 Ca1 C32B 106.93(12) . . 
C8 Ca1 C32B 85.77(11) . . 
C3 Ca1 C32B 108.55(11) . . 
C1 Ca1 C32B 116.70(12) . . 
C2 Ca1 C32B 133.02(12) . . 
C4 Ca1 C32B 81.95(12) . . 
C7 Ca1 C32B 80.56(12) . . 
C5 Ca1 C32B 86.59(12) . . 
C28 Ca2 C27 31.45(2) . . 
C28 Ca2 C25B 116.03(5) . . 
C27 Ca2 C25B 102.87(6) . . 
C28 Ca2 C21B 125.57(18) . . 
C27 Ca2 C21B 98.71(16) . . 
C25B Ca2 C21B 31.71(16) . . 
C28 Ca2 C21A 122.80(16) . . 
C27 Ca2 C21A 94.60(15) . . 
C28 Ca2 C22 154.20(2) . . 
C27 Ca2 C22 123.59(3) . . 
C25B Ca2 C22 50.60(5) . . 
C21B Ca2 C22 30.39(19) . . 
C21A Ca2 C22 32.07(16) . . 
C28 Ca2 C26 51.74(2) . . 
C27 Ca2 C26 31.40(2) . . 
C25B Ca2 C26 119.74(6) . . 
C21B Ca2 C26 100.05(13) . . 
C21A Ca2 C26 94.35(14) . . 
C22 Ca2 C26 111.59(3) . . 
C28 Ca2 C23A 154.82(6) . . 
C27 Ca2 C23A 143.86(7) . . 
C21A Ca2 C23A 52.14(16) . . 
C22 Ca2 C23A 32.23(8) . . 
C26 Ca2 C23A 143.44(8) . . 
C28 Ca2 C24A 124.27(6) . . 
C27 Ca2 C24A 119.66(6) . . 
C21A Ca2 C24A 51.27(14) . . 
C22 Ca2 C24A 52.27(5) . . 
C26 Ca2 C24A 139.47(6) . . 
C23A Ca2 C24A 30.87(7) . . 
C28 Ca2 C25A 110.23(5) . . 
C27 Ca2 C25A 93.26(6) . . 
C21A Ca2 C25A 30.70(15) . . 
C22 Ca2 C25A 52.07(5) . . 
C26 Ca2 C25A 108.71(6) . . 
C23A Ca2 C25A 51.23(8) . . 
C24A Ca2 C25A 30.77(7) . . 
C28 Ca2 C29 31.28(2) . . 
C27 Ca2 C29 51.61(2) . . 
C25B Ca2 C29 147.15(5) . . 
C21B Ca2 C29 149.30(15) . . 
C21A Ca2 C29 144.22(14) . . 
C22 Ca2 C29 157.20(2) . . 
C26 Ca2 C29 51.16(3) . . 
C23A Ca2 C29 163.59(8) . . 
C24A Ca2 C29 150.31(5) . . 
C25A Ca2 C29 141.29(5) . . 
C28 Ca2 C24B 132.85(5) . . 
C27 Ca2 C24B 131.69(6) . . 
C25B Ca2 C24B 30.81(7) . . 
C21B Ca2 C24B 51.16(14) . . 
C22 Ca2 C24B 49.76(4) . . 
C26 Ca2 C24B 149.74(6) . . 
C29 Ca2 C24B 152.60(5) . . 
 
 
# END of CIF
